# Supplementary material for: OceanSODA-UNEXE: a multi-year gridded Amazon and Congo River outflow surface ocean carbonate system dataset
Source: Copernicus journal article supplement (doi:10.5194/essd-15-2499-2023), 2023-06-16
Supplement: Supplementary file 1 [file essd-15-2499-2023-supplement.zip]

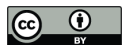

## *Supplement of*

# **OceanSODA-UNEXE: a multi-year gridded Amazon and Congo River outflow surface ocean carbonate system dataset**

**Richard P. Sims et al.**

*Correspondence to:* Richard P. Sims ([richardpeter.sims@ucalgary.ca](mailto:richardpeter.sims@ucalgary.ca))

- [essd-15-2499-2023-supplement-title-page.pdf](#)
- Algorithm evaluation output
  - [Gridded\\_data\\_summary\\_stats\\_oceansoda\\_amazon\\_plume.csv](#)
  - [Gridded\\_data\\_summary\\_stats\\_oceansoda\\_congo.csv](#)
  - [algo\\_metrics](#)
    - \* [Amazon\\_AT\\_finalscores\\_pickled.txt](#)
    - \* [Amazon\\_DIC\\_finalscores\\_pickled.txt](#)
    - \* [Congo\\_AT\\_finalscores\\_pickled.txt](#)
    - \* [Congo\\_DIC\\_finalscores\\_pickled.txt](#)
    - \* [combination0\\_\\_SST-ESACCI\\_SSS-ESACCI](#)
    - \* [combination10\\_\\_SST-CORA\\_SSS-ISAS](#)
    - \* [combination11\\_\\_SST-OISST\\_SSS-ISAS](#)
    - \* [combination1\\_\\_SST-CORA\\_SSS-ESACCI](#)
    - \* [combination2\\_\\_SST-OISST\\_SSS-ESACCI](#)
    - \* [combination3\\_\\_SST-ESACCI\\_SSS-CORA](#)
    - \* [combination4\\_\\_SST-CORA\\_SSS-CORA](#)
    - \* [combination5\\_\\_SST-OISST\\_SSS-CORA](#)
    - \* [combination6\\_\\_SST-ESACCI\\_SSS-RSS-SMAP](#)
    - \* [combination7\\_\\_SST-CORA\\_SSS-RSS-SMAP](#)
    - \* [combination8\\_\\_SST-OISST\\_SSS-RSS-SMAP](#)
    - \* [combination9\\_\\_SST-ESACCI\\_SSS-ISAS](#)
    - \* [overall\\_best\\_algos.csv](#)
    - \* [overall\\_best\\_algos\\_min\\_years=8.csv](#)
    - \* [overall\\_best\\_algos\\_unweighted.csv](#)
    - \* [overall\\_best\\_algos\\_unweighted\\_min\\_years=8.csv](#)
    - \* [summary\\_best\\_algos.csv](#)
    - \* [summary\\_best\\_algos\\_no\\_n\\_req.csv](#)

- \* summary\_best\_algos\_unweighted.csv
  - \* summary\_best\_algos\_unweighted\_no\_n\_req.csv
- logs
  - \* osoda\_algorithm\_comparison.log
- mdb\_flag.csv
- Python processing scripts
  - .gitignore
  - README.md
  - \_\_pycache\_\_
    - \* osoda\_algorithm\_comparison.cpython-38.pyc
    - \* osoda\_calculate\_gridded\_predictions.cpython-38.pyc
    - \* osoda\_dic\_outflow.cpython-38.pyc
    - \* osoda\_global\_settings.cpython-38.pyc
  - aux\_data
    - \* REFERENCE\_FILE\_FOR\_METADATA-REYNOLDS.nc
    - \* World\_Seas-IHO-mask.nc
    - \* algo\_specific\_masks
    - \* depth\_mask\_500m.nc
    - \* distance\_to\_land\_mask\_250km.nc
    - \* distance\_to\_land\_mask\_300km.nc
    - \* grid\_areas\_1.0x1.0.csv
    - \* osoda\_region\_masks\_v2.nc
    - \* rebinned\_dist\_to\_land\_matrix\_1.0x1.0deg.csv
    - \* reference\_data
  - data
  - example\_metrics\_from\_algo\_output.py
  - load\_all\_mdb.py
  - os\_algorithms
    - \* \_\_init\_\_.py
    - \* \_\_pycache\_\_
    - \* at\_algorithms.py
    - \* base\_algorithm.py
    - \* diagnostic\_plotting.py
    - \* dic\_algorithms.py
    - \* matchup\_summary.py
    - \* metrics.py
    - \* utilities.py
  - os\_dic\_outflow
    - \* \_\_init\_\_.py
    - \* \_\_pycache\_\_
    - \* analysis\_tools.py
    - \* assess\_perimeter\_methods.py
    - \* calc\_dic\_outflow\_from\_transects.py
    - \* preprocess\_discharge\_data.py
    - \* process\_dic\_outflow\_transects.py

- os\_gridded\_time\_series
  - \* \_\_init\_\_.py
  - \* \_\_pycache\_\_
  - \* analysis\_tools.py
  - \* get\_prediction\_datasets.py
  - \* gridded\_predictions.py
  - \* gridded\_predictions\_inc\_bottom\_up.py
- os\_plots
- osoda\_algorithm\_comparison.py
- osoda\_algorithm\_metrics\_custom\_algos.py
- osoda\_calculate\_gridded\_predictions.py
- osoda\_dic\_outflow.py
- osoda\_driver.py
- osoda\_global\_settings.py
- osoda\_plot.py
- osoda\_plot\_inc\_bottom\_up.py
- osoda\_reef\_vulnerability.py
- osoda\_trends\_in\_variables.py
- output
- Sims\_Oceansoda\_ESSD\_2023-04-25\_Supplementary materials.docx

The copyright of individual parts of the supplement might differ from the article licence.
